# Supplementary figures and images for: The Evolutionary Scenario of Pediatric Unclassified Primary Antibody Deficiency to Adulthood
Source: MDPI journal article supplement (doi:10.3390/jcm12134206), 2023-06-22

Supplementary Figure S1

Family A

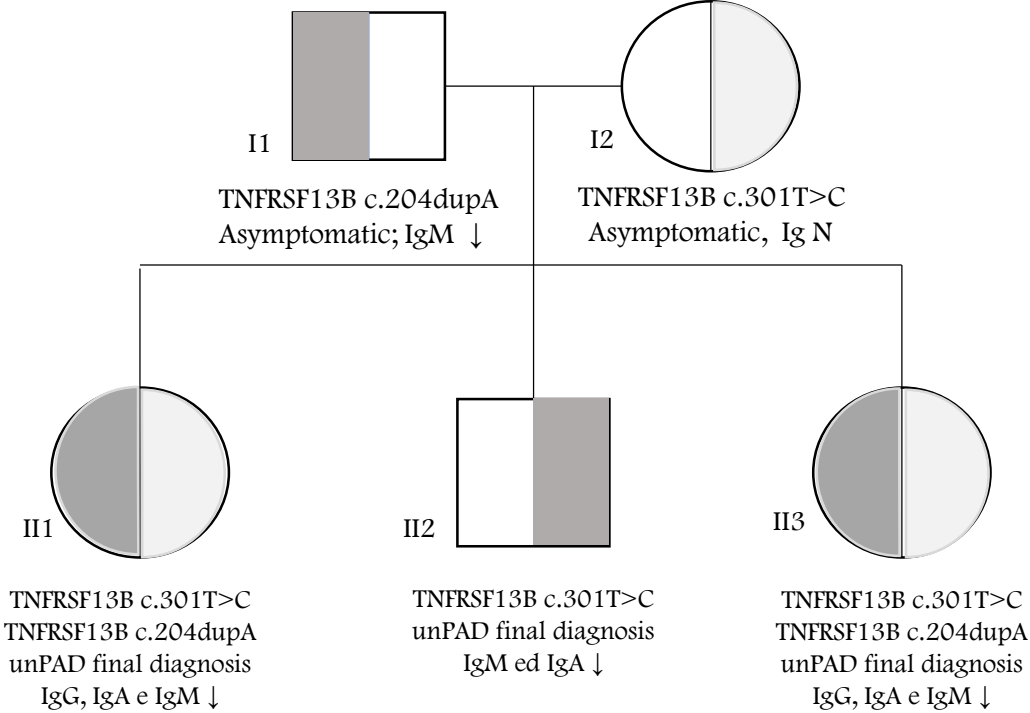

Family B

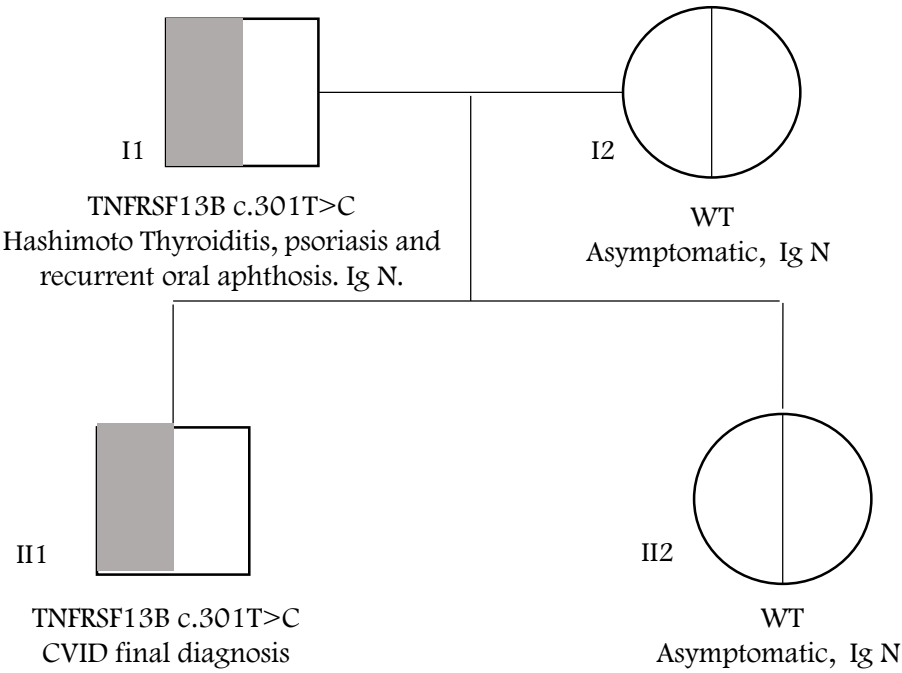

Supplement: s1 [file s1]
